# Supplementary material for: Influence of Redox Stress on Crosstalk between Fibroblasts and Keratinocytes
Source: MDPI journal article supplement (doi:10.3390/biology10121338), 2021-12-16
Supplement: s1 [file s1]

## Supplementary Information

### Influence of redox stress on crosstalk between fibroblasts and keratinocytes

Pradeep Bhartiya<sup>1</sup>, Kai Masur<sup>2</sup>, Debarati Shome<sup>2</sup>, Neha Kaushik<sup>3</sup>, Linh N. Nguyen<sup>1</sup>, Nagendra Kumar Kaushik<sup>1\*</sup>, Eun Ha Choi<sup>1\*</sup>

<sup>1</sup> Plasma Bioscience Research Center, Applied Plasma Medicine Center, Department of Electrical and Biological Physics, Kwangwoon University, 01897, Seoul, Korea; pradeepindian65@gmail.com (P.B.), nhathinhusth@gmail.com (L.N.N.)

<sup>2</sup> ZIK *plasmatis*, Leibniz Institute for Plasma Science and Technology, 17489 Greifswald, Germany; kai.masur@inp-greifswald.de (K.M.)

<sup>3</sup> Department of Biotechnology, College of Engineering, University of Suwon, Hwaseong, 18323, Korea; neha.bioplasma@gmail.com

\* Correspondence: kaushik.nagendra@kw.ac.kr (N.K.K.) and ehchoi@kw.ac.kr (E.H.C.)

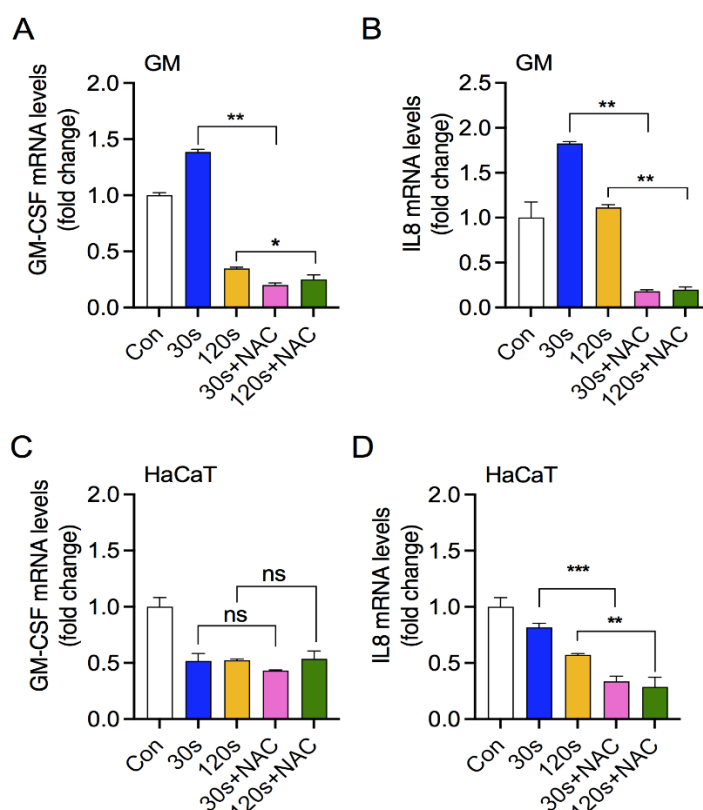

Figure S1: N-acetyl-L-cysteine inhibits CAP induced cytokines. The top horizontal panel shows gene expression profile for (A) GM-CSF and (B) IL-8 in GM cells, whereas bottom horizontal panel represents gene expression profile for (C) GM-CSF and (D) IL-8 in HaCaT cells. Statistical significance was determined using two-tailed Student's t-test and is denoted as \*  $p < 0.05$ , \*\*  $p < 0.01$ , and \*\*\*  $p < 0.001$
